# Supplementary material for: LINC00452 promotes ovarian carcinogenesis through increasing ROCK1 by sponging miR-501-3p and suppressing ubiquitin-mediated degradation
Source: publisher site journal article supplement (doi:10.18632/aging.103758), 2020-11-08
Supplement: Supplementary file [file aging-v12i21-103758-supplementary-material-SD2.pdf]

## SUPPLEMENTARY TABLES

**Supplementary Table 1. Seven identified lncRNAs that are overlapped in three human ovarian cancer microarray datasets GSE18521, GSE14407 and GSE23391.**

| ID              | RNA type | Size (bp) | Association with prognosis |
|-----------------|----------|-----------|----------------------------|
| LINC00452       | LncRNA   | 1607      | Negative                   |
| LINC01144       | LncRNA   | 1740      | Positive                   |
| DIAPH2-AS1      | LncRNA   |           | Positive                   |
| FOXP4-AS1       | LncRNA   |           | Positive                   |
| MIAT/ LINC00066 | LncRNA   |           | Positive                   |
| RP11-108L7.15   | LncRNA   |           | Positive                   |
| SLC25A5-AS1     | LncRNA   |           | Positive                   |

**Supplementary Table 2. Seven miRNAs that are overlapped in miRNA profiling array datasets GSE119055 and GSE48485.**

|           | ID       | adj.P.Val | P.Value  | t        | B        | logFC    | miRNA_ID        |
|-----------|----------|-----------|----------|----------|----------|----------|-----------------|
| GSE119055 | 20504340 | 0.974826  | 8.69E-01 | -0.16999 | -6.42903 | -0.02683 | hsa-miR-600     |
| GSE48485  | 610      | 0.612     | 0.091979 | -2.63972 | -4.044   | -3.2123  | hsa-miR-600     |
| GSE119055 | 20504410 | 0.6163    | 1.28E-01 | -1.68    | -5.12077 | -0.25892 | hsa-miR-548d-3p |
| GSE48485  | 3927     | 0.97      | 0.883585 | -0.16154 | -5.022   | -0.19657 | hsa-miR-548d-3p |
| GSE119055 | 20506712 | 0.699492  | 2.00E-01 | -1.3863  | -5.50315 | -0.85628 | hsa-miR-1180-3p |
| GSE48485  | 1071     | 0.749     | 0.329214 | -1.05393 | -4.914   | -1.89672 | hsa-miR-1180    |
| GSE119055 | 20503103 | 0.618973  | 1.31E-01 | -1.66853 | -5.13644 | -2.21175 | hsa-miR-485-5p  |
| GSE48485  | 4131     | 0.604     | 0.087401 | -2.17099 | -3.988   | -2.59367 | hsa-miR-485-5p  |
| GSE119055 | 20503878 | 0.013204  | 2.89E-05 | -7.92849 | 2.979649 | -2.6724  | hsa-miR-501-3p  |
| GSE48485  | 7976     | 0.798     | 0.434801 | -0.81186 | -5.33    | -0.85363 | hsa-miR-501-3p  |
| GSE119055 | 20503872 | 0.652933  | 1.57E-01 | -1.5494  | -5.29586 | -0.23384 | hsa-miR-516a-3p |
| GSE48485  | 9475     | 0.574     | 0.039517 | -3.91237 | -3.802   | -4.76101 | hsa-miR-516a-3p |
| GSE119055 | 20504316 | 0.904389  | 6.24E-01 | -0.50802 | -6.3065  | -0.26299 | hsa-miR-548a-3p |
| GSE48485  | 11244    | 0.574     | 0.038362 | -3.96387 | -3.795   | -4.82368 | hsa-miR-548a-3p |

**Supplementary Table 3. Sequences of the constructs for LINC00452 knockdown, miR-501-3P overexpression and knockdown**

| Sequence name          | Sense (5'-3')          | Antisense (5'-3')     |
|------------------------|------------------------|-----------------------|
| LINC00452-476          | AGAAGAAGAGGCUGAAUCCTT  | GGAUUCAGCCUCUUCUUCUTT |
| LINC00452-546          | AUUUCCUAGGGAAACUCUGTT  | CAGAGUUUCCUAGGAAAUUTT |
| LINC00452-1569         | UUAUCCACAGUUCAAGUGTT   | CACUUGAACUGUGAAUAATT  |
| Negative control FAM   | UUCUCCGAACGUGUCACGUTT  | ACGUGACACGUUCGGAGAATT |
| miR-501 -3P-Mimics     | AAUGCACCCGGGCAAGGAUUCU |                       |
| miR-501 -3P-inhibitors | AGAAUCCUUGCCCGGGUGCAUU |                       |
| Negative control RNAi  | UUCUCCGAACGUGUCACGUTT  | ACGUGACACGUUCGGAGAATT |
